# Supplementary material
Source: MDPI journal article supplement (https://www.mdpi.com/2073-4441/14/6/960)
Supplement: s1 [file s1]

**Table S1.** Bacteria and ARG Primer List.

| <b>Macrolide (Erythromycin) Resistant Genes</b> |               |                                  |             |                       |                           |
|-------------------------------------------------|---------------|----------------------------------|-------------|-----------------------|---------------------------|
|                                                 | <b>Primer</b> | <b>Primer Sequence (5'-3') †</b> | <b>Tm ‡</b> | <b>PCR</b>            | <b>Reference</b>          |
| <b>Gene</b>                                     |               |                                  | <b>(°C)</b> | <b>Product (bp) §</b> |                           |
| <i>Enterococcus spp.</i>                        |               |                                  |             |                       |                           |
| <i>ermB</i>                                     | F             | GAT ACC GTT TAC GAA ATT GG       | 58.0        | 364                   | Chen et al. 2007          |
|                                                 | R             | GAA TCG AGA CTT GAG TGT GC       |             |                       |                           |
| <i>msrA</i>                                     | F             | CAAATGGCACAAGCATCATC             | 58.0        | 158                   | Szczepanowski et al. 2009 |
|                                                 | R             | TGTGGTTTTTCAACTTCTTCCA           |             |                       |                           |
| <i>msrC</i>                                     | F             | TCGTTTTGTCATGAGACAAACAG          | 58.0        | 191                   | Beukers et al. 2015       |
|                                                 | R             | AAATTAGTCGGTTCATCTAACAG          |             |                       |                           |
| <i>mefA</i>                                     | F             | GGAGCTACCTGTCTGGATGG             | 58.0        | 199                   | Szczepanowski et al. 2009 |
|                                                 | R             | CAACCGCCGGACTAACAATA             |             |                       |                           |
| <i>ermQ</i>                                     | F             | CACCAACTGATATGTGGCTAG            | 68,60       | 154                   | Koike et al. 2009         |
|                                                 | R             | CTAGGCATGGGATGGAAGTC             |             |                       |                           |
| <i>ermT</i>                                     | F             | CATATAAATGAAATTTTGAG             | 51.0        | 369                   | Chen et al. 2007          |
|                                                 | R             | ACGATTTGTATTTAGCAACC             |             |                       |                           |
| <b>Tetracycline Resistant Genes</b>             |               |                                  |             |                       |                           |
| <b>Target</b>                                   | <b>Primer</b> | <b>Primer Sequence (5'-3') †</b> | <b>Tm‡</b>  | <b>PCR</b>            | <b>Reference</b>          |
| <i>Enterococcus spp.</i>                        |               |                                  |             |                       |                           |
|                                                 |               |                                  |             |                       |                           |
| <i>tetM</i>                                     | F             | GTG GAC AAA GGT ACA ACG AG       | 55.0        | 406                   | Ng et al. 2001            |
|                                                 | R             | CGG TAA AGT TCG TCA CAC AC       |             |                       |                           |
| <i>tetL</i>                                     | F             | TCG TTA GCG TGC TGT CAT TC       | 55.0        | 267                   | Ng et al. 2001            |
|                                                 | R             | GTA TCC CAC CAA TGT AGC CG       |             |                       |                           |
| <i>tetO</i>                                     | F             | AAC TTA GGC ATT CTG GCT CAC      | 55.0        | 515                   | Ng et al. 2001            |
|                                                 | R             | TCC CAC TGT TCC ATA TCG TCA      |             |                       |                           |
| <i>tetS</i>                                     | F             | CAT AGA CAA GCC GTT GAC C        | 55.0        | 667                   | Ng et al. 2001            |
|                                                 | R             | ATG TTT TTG GAA CGC CAG AG       |             |                       |                           |

| Gene                                      |        |                                      | (°C)            | Product (bp) <sup>§</sup> |                     |
|-------------------------------------------|--------|--------------------------------------|-----------------|---------------------------|---------------------|
|                                           |        |                                      |                 |                           |                     |
| <i>E. coli</i>                            |        |                                      |                 |                           |                     |
|                                           |        |                                      |                 |                           |                     |
| <i>tetA</i>                               | F      | GCT ACA TCC TGC TTG CCT TC           | 55.0            | 210                       | Ng et al. 2001      |
|                                           | R      | CAT AGA TCG CCG TGA AGA GG           |                 |                           |                     |
| <i>tetB</i>                               | F      | TTG GTT AGG GGC AAG TTT TG           | 55.0            | 659                       | Ng et al. 2001      |
|                                           | R      | GTA ATG GGC CAA TAA CAC CG           |                 |                           |                     |
| <b>B-Lactam Resistant Genes</b>           |        |                                      |                 |                           |                     |
| Target                                    | Primer | Primer Sequence (5'-3') <sup>†</sup> | Tm <sup>‡</sup> | PCR                       | Reference           |
| Gene                                      |        |                                      | (°C)            | Product (bp) <sup>§</sup> |                     |
|                                           |        |                                      |                 |                           |                     |
| <i>E. coli</i>                            |        |                                      |                 |                           |                     |
|                                           |        |                                      |                 |                           |                     |
| <i>bla</i> CMY-2                          | F      | GACAGCCTCTTTCTCCACA                  | 55.0            | 1015                      | Gray et al. 2004    |
|                                           | R      | TGGAACGAAGGCTACGTA                   |                 |                           |                     |
| <i>bla</i> CTX-M                          | F      | ATGTGCAGYACCAGTAA                    | 55.0            | 512                       | Cottell et al. 2013 |
|                                           | R      | CCGCTGCCGGTYTTATC                    |                 |                           |                     |
| <i>bla</i> DHA                            | F      | TTATCTCACACCTTTATTACTG               | 55.0            | 139                       | Geyer et al. 2012   |
|                                           | R      | TATCTTTTGAGGCGGATT                   |                 |                           |                     |
| <i>bla</i> OXA-1                          | F      | CACTTACAGGAAACTTGGGGTC<br>G          | 55.0            | ~65                       | Knapp et al. 2010   |
|                                           | R      | AGTGTGTTTAGAATGGTGATC                |                 |                           |                     |
| <b>Enterococcus spp. and E.coli Genes</b> |        |                                      |                 |                           |                     |
| Target                                    | Primer | Primer Sequence (5'-3') <sup>†</sup> | Tm <sup>‡</sup> | PCR                       | Reference           |
| Gene                                      |        |                                      | (°C)            | Product (bp) <sup>§</sup> |                     |
| <i>E. coli</i>                            |        |                                      |                 |                           |                     |
| <i>uidA</i>                               | F      | ATCGGCGAAATTCCATACCTG                | 58.0            | 319                       | Horakova 2006       |
|                                           | R      | GTTCTGCGACGCTCACACC                  |                 |                           |                     |

|                          |   |                              |      |     |                      |
|--------------------------|---|------------------------------|------|-----|----------------------|
| <b>lacZ</b>              | F | ATGAAAGCTGGCTACAGGAAGG<br>CC | 58.0 | 264 | Bej et al. 1991      |
|                          | R | GGTTTATGCAGCAACGAGACGT<br>CA |      |     |                      |
| <b>lacY</b>              | F | ACCAGACCCAGCACCAGATAAG       | 58.0 | 463 | Horakova<br>2008     |
|                          | R | GCACCTACGATGTTTTTGACCA       |      |     |                      |
| <b>cyd</b>               | F | CCGTATCATGGTGGCGTGTGG        | 58.0 | 393 | Horakova<br>2006     |
|                          | R | GCCGGCTGAGTAGTCGTGGAAG       |      |     |                      |
|                          |   |                              |      |     |                      |
| <i>Enterococcus</i> spp. |   |                              |      |     |                      |
|                          |   |                              |      |     |                      |
| <b>ENT</b>               | F | AGAAATTCCAAACGAACTTG         | 60.0 | 106 | Farhm et al.<br>2003 |
|                          | R | CAGTGCTCTACCTCCATCATT        |      |     |                      |

**Table S2.** Number of resistant isolates for Bowling Green, KY and Tampa Bay Metropolitan Area, FL urban karst groundwater systems defined by antibiotic group and resistance phenotypes.

| Antibiotic Resistant Genes Associated with Resistance Phenotypes |                                                                                |                                                                            |                                                               |                                                                              |                                                                 |
|------------------------------------------------------------------|--------------------------------------------------------------------------------|----------------------------------------------------------------------------|---------------------------------------------------------------|------------------------------------------------------------------------------|-----------------------------------------------------------------|
| Enterococcus spp. Resistant Genes                                | Macrolide Antibiotic Resistant Gene                                            | Bowling Green, KY<br>number of resistant isolates for antibiotic group (n) | Bowling Green, KY<br>number of resistant isolates for ARG (n) | Tampa Bay Metro, FL<br>number of resistant isolates for antibiotic group (n) | Tampa Bay Metro, FL<br>number of resistant isolates for ARG (n) |
|                                                                  | <i>ermB</i>                                                                    | 492                                                                        | 409                                                           | 11                                                                           | 11                                                              |
|                                                                  | <i>msrA</i>                                                                    |                                                                            | 5                                                             |                                                                              | -                                                               |
|                                                                  | <i>msrC</i>                                                                    |                                                                            | 42                                                            |                                                                              | -                                                               |
|                                                                  | <i>ermQ</i>                                                                    |                                                                            | 16                                                            |                                                                              | -                                                               |
|                                                                  | <i>ermT</i>                                                                    |                                                                            | 8                                                             |                                                                              | -                                                               |
|                                                                  | <i>mefA</i>                                                                    |                                                                            | 12                                                            |                                                                              | -                                                               |
|                                                                  | Tetracycline Antibiotic Resistant Gene                                         |                                                                            |                                                               |                                                                              |                                                                 |
|                                                                  | <i>tetM</i>                                                                    | 836                                                                        | 730                                                           | 37                                                                           | 26                                                              |
|                                                                  | <i>tetL</i>                                                                    |                                                                            | 85                                                            |                                                                              | 7                                                               |
|                                                                  | <i>tetO</i>                                                                    |                                                                            | 12                                                            |                                                                              | 2                                                               |
|                                                                  | <i>tetS</i>                                                                    |                                                                            | 9                                                             |                                                                              | 2                                                               |
| E.coli Resistant Genes                                           | Tetracycline Antibiotic Resistant Gene                                         |                                                                            |                                                               |                                                                              |                                                                 |
|                                                                  | <i>tetA</i>                                                                    | 865                                                                        | 475                                                           | 28                                                                           | 12                                                              |
|                                                                  | <i>tetB</i>                                                                    |                                                                            | 390                                                           |                                                                              | 16                                                              |
|                                                                  | Beta-Lactam (including 3rd generation cephalosporin) Antibiotic Resistant Gene |                                                                            |                                                               |                                                                              |                                                                 |
|                                                                  | <i>bla</i> CMY-2                                                               | 884                                                                        | 211                                                           | 17                                                                           | 10                                                              |
|                                                                  | <i>bla</i> CTX-M                                                               |                                                                            | 673                                                           |                                                                              | 5                                                               |

|  |                  |  |   |  |   |
|--|------------------|--|---|--|---|
|  | <i>bla</i> DHA   |  | 6 |  | 0 |
|  | <i>bla</i> OXA-1 |  | 5 |  | 2 |

**Table S3.** Number of *Enterococcus* spp. resistant isolates for Bowling Green, KY urban karst groundwater systems defined by sample site, season, antibiotic group, and resistance phenotypes.

| Antibiotic Resistant Genes Associated with Resistant Phenotypes |                    |                                          |                                     |                                     |                                     |                                     |                                     |                                        |                                 |                                 |                                 |                                 |
|-----------------------------------------------------------------|--------------------|------------------------------------------|-------------------------------------|-------------------------------------|-------------------------------------|-------------------------------------|-------------------------------------|----------------------------------------|---------------------------------|---------------------------------|---------------------------------|---------------------------------|
| Season                                                          | Sample Site        | <i>Enterococcus</i> spp. Resistant Genes |                                     |                                     |                                     |                                     |                                     |                                        |                                 |                                 |                                 |                                 |
|                                                                 |                    | Macrolide Antibiotic Resistant Gene      |                                     |                                     |                                     |                                     |                                     | Tetracycline Antibiotic Resistant Gene |                                 |                                 |                                 |                                 |
|                                                                 |                    | Number of Resistant Isolates (n)         | <i>erm</i> B Resistant Isolates (n) | <i>msr</i> A Resistant Isolates (n) | <i>msr</i> C Resistant Isolates (n) | <i>erm</i> Q Resistant Isolates (n) | <i>erm</i> T Resistant Isolates (n) | Number of Resistant Isolates (n)       | <i>tet</i> M Resistant Isolates | <i>tet</i> L Resistant Isolates | <i>tet</i> O Resistant Isolates | <i>tet</i> S Resistant Isolates |
| Spring                                                          | ByPass Cave        | 58                                       | 5                                   | 0                                   | 4                                   | 4                                   | 0                                   | 89                                     | 28                              | 1                               | 0                               | 0                               |
|                                                                 | Durbin Well        | 58                                       | 14                                  | 0                                   | 2                                   | 2                                   | 0                                   | 90                                     | 30                              | 0                               | 0                               | 0                               |
|                                                                 | Barren River       | 53                                       | 14                                  | 0                                   | 5                                   | 0                                   | 0                                   | 89                                     | 27                              | 1                               | 1                               | 2                               |
|                                                                 | Carver Well Cave   | 33                                       | 6                                   | 2                                   | 0                                   | 0                                   | 0                                   | 83                                     | 26                              | 0                               | 0                               | 2                               |
|                                                                 | Lost River Rise    | 63                                       | 13                                  | 0                                   | 6                                   | 0                                   | 0                                   | 88                                     | 24                              | 1                               | 2                               | 0                               |
|                                                                 | New Spring         | 54                                       | 12                                  | 0                                   | 2                                   | 1                                   | 0                                   | 86                                     | 26                              | 1                               | 0                               | 1                               |
|                                                                 | Whiskey Run Spring | 50                                       | 15                                  | 0                                   | 2                                   | 1                                   | 0                                   | 84                                     | 24                              | 2                               | 0                               | 0                               |
|                                                                 | Lost River Spring  | 51                                       | 11                                  | 0                                   | 3                                   | 0                                   | 0                                   | 92                                     | 26                              | 2                               | 0                               | 0                               |
|                                                                 | Payne Well         | 36                                       | 5                                   | 0                                   | 1                                   | 0                                   | 0                                   | 81                                     | 21                              | 1                               | 0                               | 0                               |

|               |                    |    |    |   |   |   |   |    |    |   |   |   |
|---------------|--------------------|----|----|---|---|---|---|----|----|---|---|---|
|               | Vine Well          | 36 | 16 | 0 | 4 | 0 | 0 | 56 | 23 | 2 | 1 | 0 |
| <b>Summer</b> | ByPass Cave        | 58 | 17 | 2 | 2 | 4 | 0 | 89 | 21 | 3 | 0 | 0 |
|               | Durbin Well        | 58 | 14 | 0 | 0 | 0 | 0 | 90 | 17 | 6 | 1 | 0 |
|               | Barren River       | 53 | 10 | 0 | 0 | 0 | 0 | 89 | 21 | 3 | 0 | 0 |
|               | Carver Well Cave   | 33 | 12 | 0 | 0 | 0 | 0 | 83 | 19 | 5 | 0 | 0 |
|               | Lost River Rise    | 63 | 15 | 0 | 1 | 0 | 0 | 88 | 19 | 3 | 1 | 1 |
|               | New Spring         | 54 | 11 | 0 | 0 | 1 | 0 | 86 | 18 | 6 | 0 | 0 |
|               | Whiskey Run Spring | 50 | 9  | 0 | 2 | 1 | 0 | 84 | 23 | 1 | 0 | 0 |
|               | Lost River Spring  | 51 | 10 | 0 | 1 | 0 | 2 | 92 | 26 | 0 | 0 | 0 |
|               | Payne Well         | 36 | 4  | 0 | 0 | 2 | 4 | 81 | 20 | 3 | 0 | 2 |
|               | Vine Well          | 36 | 10 | 0 | 0 | 1 | 0 | 56 | 18 | 4 | 0 | 0 |
| <b>Fall</b>   | ByPass Cave        | 58 | 25 | 0 | 0 | 0 | 0 | 89 | 21 | 4 | 1 | 0 |
|               | Durbin Well        | 58 | 16 | 0 | 0 | 0 | 0 | 90 | 19 | 5 | 2 | 0 |
|               | Barren River       | 53 | 16 | 0 | 0 | 0 | 0 | 89 | 23 | 3 | 0 | 0 |
|               | Carver Well Cave   | 33 | 10 | 0 | 0 | 0 | 0 | 83 | 19 | 5 | 0 | 0 |
|               | Lost River Rise    | 63 | 22 | 0 | 0 | 0 | 2 | 88 | 19 | 6 | 0 | 0 |
|               | New Spring         | 54 | 23 | 1 | 0 | 0 | 0 | 86 | 22 | 4 | 0 | 0 |
|               | Whiskey Run Spring | 50 | 12 | 0 | 2 | 0 | 0 | 84 | 25 | 0 | 1 | 0 |
|               | Lost River Spring  | 51 | 20 | 0 | 0 | 0 | 0 | 92 | 19 | 7 | 0 | 0 |
|               | Payne Well         | 36 | 9  | 0 | 3 | 0 | 0 | 81 | 22 | 2 | 0 | 0 |
|               | Vine Well          | 36 | -  | - | - | - | - | 56 | 2  | - | - | - |

|               |                    |    |    |   |   |   |   |    |    |   |   |   |
|---------------|--------------------|----|----|---|---|---|---|----|----|---|---|---|
| <b>Winter</b> | ByPass Cave        | 58 | 4  | 0 | 0 | 0 | 0 | 89 | 10 | 0 | 0 | 0 |
|               | Durbin Well        | 58 | 2  | 0 | 1 | 1 | 0 | 90 | 10 | 0 | 0 | 0 |
|               | Barren River       | 53 | 14 | 0 | 0 | 0 | 0 | 89 | 6  | 0 | 0 | 1 |
|               | Carver Well Cave   | 33 | 3  | 0 | 0 | 0 | 0 | 83 | 6  | 0 | 0 | 0 |
|               | Lost River Rise    | 63 | 4  | 0 | 0 | 0 | 0 | 88 | 10 | 2 | 0 | 0 |
|               | New Spring         | 54 | 4  | 0 | 1 | 0 | 0 | 86 | 8  | 0 | 0 | 0 |
|               | Whiskey Run Spring | 50 | 2  | 0 | 0 | 0 | 0 | 84 | 8  | 0 | 0 | 0 |
|               | Lost River Spring  | 51 | 2  | 0 | 1 | 0 | 0 | 92 | 8  | 2 | 2 | 0 |
|               | Payne Well         | 36 | 4  | 0 | 0 | 0 | 0 | 81 | 10 | 0 | 0 | 0 |
|               | Vine Well          | 36 | 4  | 0 | 0 | 0 | 0 | 56 | 6  | 0 | 0 | 0 |

**Table S4.** Number of *E. coli* resistant isolates for Bowling Green, KY urban karst groundwater systems defined by sample site, season, antibiotic group, and resistance phenotypes.

| <b>Antibiotic Resistant Genes Associated with Resistant Phenotypes</b> |                    |                                                 |                                           |                                           |                                              |                                     |                                     |                                              |                                                |
|------------------------------------------------------------------------|--------------------|-------------------------------------------------|-------------------------------------------|-------------------------------------------|----------------------------------------------|-------------------------------------|-------------------------------------|----------------------------------------------|------------------------------------------------|
| <b>Season</b>                                                          | <b>Sample Site</b> | <b><i>E.coli</i> Antibiotic Resistant Genes</b> |                                           |                                           |                                              |                                     |                                     |                                              |                                                |
|                                                                        |                    | <b>Tetracycline Antibiotic Resistant Gene</b>   |                                           |                                           | <b>Beta-Lactam Antibiotic Resistant Gene</b> |                                     |                                     |                                              |                                                |
|                                                                        |                    | <b>Number of Resistant Isolates (n)</b>         | <b><i>tetA</i> Resistant Isolates (n)</b> | <b><i>tetB</i> Resistant Isolates (n)</b> | <b>Number of Resistant Isolates (n)</b>      | <b>CMY-2 Resistant Isolates (n)</b> | <b>CTX-M Resistant Isolates (n)</b> | <b><i>blaD</i> HA Resistant Isolates (n)</b> | <b><i>blaOX</i> A-1 Resistant Isolates (n)</b> |
| <b>Spring</b>                                                          | ByPass Cave        | 100                                             | 9                                         | 22                                        | 97                                           | 6                                   | 45                                  | 0                                            | 1                                              |
|                                                                        | Durbin Well        | 97                                              | 6                                         | 22                                        | 106                                          | 0                                   | 37                                  | 2                                            | 0                                              |

|               |                    |     |    |    |     |    |    |   |   |
|---------------|--------------------|-----|----|----|-----|----|----|---|---|
|               | Barren River       | 108 | 16 | 16 | 126 | 8  | 36 | 0 | 0 |
|               | Carver Well Cave   | 76  | 13 | 10 | 84  | 0  | 26 | 0 | 0 |
|               | Lost River Rise    | 94  | 11 | 17 | 127 | 7  | 35 | 0 | 0 |
|               | New Spring         | 92  | 9  | 13 | 145 | 3  | 45 | 0 | 0 |
|               | Whiskey Run Spring | 93  | 21 | 8  | 64  | 6  | 16 | 0 | 0 |
|               | Lost River Spring  | 86  | 15 | 13 | 76  | 14 | 11 | 0 | 0 |
|               | Payne Well         | 66  | 9  | 8  | 18  | -  | -  | 0 | - |
|               | Vine Well          | 53  | 17 | 7  | 52  | 7  | 19 | 0 | 1 |
| <b>Summer</b> | ByPass Cave        | 100 | 21 | 10 | 97  | 10 | 15 | 0 | 0 |
|               | Durbin Well        | 97  | 19 | 14 | 106 | 1  | 41 | 1 | 1 |
|               | Barren River       | 108 | 17 | 15 | 126 | 5  | 17 | 0 | 0 |
|               | Carver Well Cave   | 76  | 14 | 11 | 84  | 3  | 20 | 0 | 0 |
|               | Lost River Rise    | 94  | 15 | 16 | 127 | 8  | 21 | 0 | 0 |
|               | New Spring         | 92  | 15 | 16 | 145 | 4  | 39 | 0 | 1 |
|               | Whiskey Run Spring | 93  | 14 | 14 | 64  | 14 | 3  | 2 | 0 |
|               | Lost River Spring  | 86  | 13 | 13 | 76  | 2  | 22 | 0 | 0 |
|               | Payne Well         | 66  | 15 | 9  | 18  | 2  | 9  | 0 | 0 |
|               | Vine Well          | 53  | 15 | 8  | 52  | 11 | 4  | 0 | 0 |
| <b>Fall</b>   | ByPass Cave        | 100 | 14 | 13 | 97  | 13 | 3  | 0 | 0 |
|               | Durbin Well        | 97  | 17 | 14 | 106 | 8  | 13 | 0 | 0 |
|               | Barren River       | 108 | 24 | 7  | 126 | 7  | 41 | 0 | 0 |
|               | Carver Well Cave   | 76  | 16 | 7  | 84  | 9  | 22 | 0 | 0 |
|               | Lost River Rise    | 94  | 14 | 12 | 127 | 11 | 34 | 0 | 1 |
|               | New Spring         | 92  | 18 | 11 | 145 | 10 | 30 | 0 | 0 |
|               | Whiskey Run Spring | 93  | 20 | 10 | 64  | 12 | 11 | 0 | 0 |
|               | Lost River Spring  | 86  | 15 | 13 | 76  | 13 | 6  | 0 | 0 |



|               |                       |     |   |    |     |   |    |   |   |
|---------------|-----------------------|-----|---|----|-----|---|----|---|---|
|               | Payne Well            | 66  | 9 | 12 | 18  | 2 | 5  | 0 | 0 |
|               | Vine Well             | 53  | 1 | 1  | 52  | 1 | 3  | 0 | 0 |
| <b>Winter</b> | ByPass Cave           | 100 | 3 | 8  | 97  | 1 | 5  | 0 | 0 |
|               | Durbin Well           | 97  | 4 | 1  | 106 | 0 | 2  | 0 | 0 |
|               | Barren River          | 108 | 5 | 8  | 126 | 4 | 8  | 0 | 0 |
|               | Carver Well<br>Cave   | 76  | 3 | 2  | 84  | 2 | 2  | 0 | 0 |
|               | Lost River Rise       | 94  | 8 | 1  | 127 | 0 | 8  | 0 | 0 |
|               | New Spring            | 92  | 6 | 4  | 145 | 2 | 11 | 0 | 0 |
|               | Whiskey Run<br>Spring | 93  | 5 | 1  | 64  | - | -  | - | - |
|               | Lost River<br>Spring  | 86  | 2 | 2  | 76  | 4 | 4  | 0 | 0 |
|               | Payne Well            | 66  | 3 | 1  | 18  | - | -  | - | - |
|               | Vine Well             | 53  | 4 | 0  | 52  | 0 | 5  | 0 | 0 |
